# Supplementary material for: Unveiling the Therapeutic Potential and Healthcare Applications of Marine Therapy: A Systematic Review with Meta-Analysis and Meta-Regression
Source: MDPI journal article supplement (doi:10.3390/md21120604), 2023-11-23
Supplement: s1 [file s1]

**Table S1.** Search queries

**PubMed and Cochrane Library**

1. Therapeutic area; Ocean  
("Oceans and Seas"[Mesh] OR "Seawater"[Mesh] OR  
"Seawater"[tiab] OR "Mineral Waters"[Mesh] OR "Mineral  
Waters"[tiab] OR "Dead sea"[tiab])
2. Intervention  
("Therapeutics"[Mesh] OR "Balneology"[Mesh] OR  
"Balneology"[tiab] OR "Mud Therapy"[Mesh] OR "Mud  
Therapy"[tiab] OR "Climatotherapy"[Mesh] OR  
"Climatotherapy"[tiab] OR "Heliotherapy"[Mesh] OR  
"Heliotherapy"[tiab])

**Embase**

1. Therapeutic area; Ocean  
( 'sea'/exp OR 'sea water'/exp OR 'mineral water'/exp OR  
sea:ab,ti OR ocean:ab,ti OR seawater:ab,ti OR 'mineral  
water':ab,ti)
2. Intervention  
( 'therapy'/exp OR therapy:ab,ti OR treatment:ab,ti OR  
therapeutics:ab,ti OR 'sea therapy':ab,ti OR 'ocean therapy':ab,ti  
OR 'marine therapy':ab,ti OR 'climatotherapy'/exp OR  
'thalassotherapy'/exp OR 'balneotherapy'/exp OR  
thalassotherapy:ab,ti OR balneotherapy:ab,ti OR  
crenobalneotherapy:ab,ti)
